# Supplementary material for: Catlas: an automated framework for catalyst discovery demonstrated for direct syngas conversion
Source: Royal Society of Chemistry journal article supplement (doi:10.1039/d2cy01267g), 2022-01-01
Supplement: d2cy01267g2.bib [file d2cy01267g2.bib]

@article{pymatgensi,
abstract = {We present the Python Materials Genomics (pymatgen) library, a robust, open-source Python library for materials analysis. A key enabler in high-throughput computational materials science efforts is a robust set of software tools to perform initial setup for the calculations (e.g., generation of structures and necessary input files) and post-calculation analysis to derive useful material properties from raw calculated data. The pymatgen library aims to meet these needs by (1) defining core Python objects for materials data representation, (2) providing a well-tested set of structure and thermodynamic analyses relevant to many applications, and (3) establishing an open platform for researchers to collaboratively develop sophisticated analyses of materials data obtained both from first principles calculations and experiments. The pymatgen library also provides convenient tools to obtain useful materials data via the Materials Projectâ€™s REpresentational State Transfer (REST) Application Programming Interface (API). As an example, using pymatgenâ€™s interface to the Materials Projectâ€™s RESTful API and phasediagram package, we demonstrate how the phase and electrochemical stability of a recently synthesized material, Li4SnS4, can be analyzed using a minimum of computing resources. We find that Li4SnS4 is a stable phase in the Liâ€“Snâ€“S phase diagram (consistent with the fact that it can be synthesized), but the narrow range of lithium chemical potentials for which it is predicted to be stable would suggest that it is not intrinsically stable against typical electrodes used in lithium-ion batteries.},
author = {Ong, Shyue Ping and Richards, William Davidson and Jain, Anubhav and Hautier, Geoffroy and Kocher, Michael and Cholia, Shreyas and Gunter, Dan and Chevrier, Vincent L. and Persson, Kristin A. and Ceder, Gerbrand},
doi = {10.1016/j.commatsci.2012.10.028},
file = {:Users/shyue/Mendeley Desktop/Ong et al/Computational Materials Science/2013 - Ong et al. - Python Materials Genomics (pymatgen) A robust, open-source python library for materials analysis.pdf:pdf;:Users/shyue/Mendeley Desktop/Ong et al/Computational Materials Science/2013 - Ong et al. - Python Materials Genomics (pymatgen) A robust, open-source python library for materials analysis(2).pdf:pdf},
issn = {09270256},
journal = {Computational Materials Science},
month = feb,
pages = {314--319},
title = {{Python Materials Genomics (pymatgen): A robust, open-source python library for materials analysis}},
url = {http://linkinghub.elsevier.com/retrieve/pii/S0927025612006295},
volume = {68},
year = {2013}
}

@article{vasp1,
  title = {Ab initio molecular dynamics for liquid metals},
  author = {Kresse, G. and Hafner, J.},
  journal = {Phys. Rev. B},
  volume = {47},
  issue = {1},
  pages = {558--561},
  numpages = {0},
  year = {1993},
  month = {Jan},
  publisher = {American Physical Society},
  doi = {10.1103/PhysRevB.47.558},
  url = {https://link.aps.org/doi/10.1103/PhysRevB.47.558}
}

@article{vasp2,
title = {Efficiency of ab-initio total energy calculations for metals and semiconductors using a plane-wave basis set},
journal = {Computational Materials Science},
volume = {6},
number = {1},
pages = {15-50},
year = {1996},
issn = {0927-0256},
doi = {https://doi.org/10.1016/0927-0256(96)00008-0},
url = {https://www.sciencedirect.com/science/article/pii/0927025696000080},
author = {G. Kresse and J. Furthmüller},
abstract = {We present a detailed description and comparison of algorithms for performing ab-initio quantum-mechanical calculations using pseudopotentials and a plane-wave basis set. We will discuss: (a) partial occupancies within the framework of the linear tetrahedron method and the finite temperature density-functional theory, (b) iterative methods for the diagonalization of the Kohn-Sham Hamiltonian and a discussion of an efficient iterative method based on the ideas of Pulay's residual minimization, which is close to an order Natoms2 scaling even for relatively large systems, (c) efficient Broyden-like and Pulay-like mixing methods for the charge density including a new special ‘preconditioning’ optimized for a plane-wave basis set, (d) conjugate gradient methods for minimizing the electronic free energy with respect to all degrees of freedom simultaneously. We have implemented these algorithms within a powerful package called VAMP (Vienna ab-initio molecular-dynamics package). The program and the techniques have been used successfully for a large number of different systems (liquid and amorphous semiconductors, liquid simple and transition metals, metallic and semi-conducting surfaces, phonons in simple metals, transition metals and semiconductors) and turned out to be very reliable.}
}

@article{vasp3,
  title = {Efficient iterative schemes for ab initio total-energy calculations using a plane-wave basis set},
  author = {Kresse, G. and Furthm\"uller, J.},
  journal = {Phys. Rev. B},
  volume = {54},
  issue = {16},
  pages = {11169--11186},
  numpages = {0},
  year = {1996},
  month = {Oct},
  publisher = {American Physical Society},
  doi = {10.1103/PhysRevB.54.11169},
  url = {https://link.aps.org/doi/10.1103/PhysRevB.54.11169}
}

@article{vasp4,
  title = {From ultrasoft pseudopotentials to the projector augmented-wave method},
  author = {Kresse, G. and Joubert, D.},
  journal = {Phys. Rev. B},
  volume = {59},
  issue = {3},
  pages = {1758--1775},
  numpages = {0},
  year = {1999},
  month = {Jan},
  publisher = {American Physical Society},
  doi = {10.1103/PhysRevB.59.1758},
  url = {https://link.aps.org/doi/10.1103/PhysRevB.59.1758}
}


@article{vasp5,
	doi = {10.1088/0953-8984/6/40/015},
	url = {https://doi.org/10.1088/0953-8984/6/40/015},
	year = 1994,
	month = {oct},
	publisher = {{IOP} Publishing},
	volume = {6},
	number = {40},
	pages = {8245--8257},
	author = {G Kresse and J Hafner},
	title = {Norm-conserving and ultrasoft pseudopotentials for first-row and transition elements},
	journal = {Journal of Physics: Condensed Matter},
	abstract = {The construction of accurate pseudopotentials with good convergence properties for the first-row and transition elements is discussed. We show that by combining an improved description of the pseudowavefunction inside the cut-off radius with the concept of ultrasoft pseudopotentials introduced by Vanderbilt optimal compromise between transferability and plane-wave convergence can be achieved. With the new pseudopotentials, basis sets with no more than 75-100 plane waves per atom are sufficient to reproduce the results obtained with the most accurate norm-conserving pseudopotentials.}
}
@article{paw,
  title = {Projector augmented-wave method},
  author = {Bl\"ochl, P. E.},
  journal = {Phys. Rev. B},
  volume = {50},
  issue = {24},
  pages = {17953--17979},
  numpages = {0},
  year = {1994},
  month = {Dec},
  publisher = {American Physical Society},
  doi = {10.1103/PhysRevB.50.17953},
  url = {https://link.aps.org/doi/10.1103/PhysRevB.50.17953}
}

@article{schumann_selectivity,
author = {Schumann, Julia and Medford, Andrew J. and Yoo, Jong Suk and Zhao, Zhi-Jian and Bothra, Pallavi and Cao, Ang and Studt, Felix and Abild-Pedersen, Frank and Nørskov, Jens K.},
title = {Selectivity of Synthesis Gas Conversion to C2+ Oxygenates on fcc(111) Transition-Metal Surfaces},
journal = {ACS Catalysis},
volume = {8},
number = {4},
pages = {3447-3453},
year = {2018},
doi = {10.1021/acscatal.8b00201},

URL = { 
        https://doi.org/10.1021/acscatal.8b00201
    
},
eprint = { 
        https://doi.org/10.1021/acscatal.8b00201
    
}

}
@article{beef,
  title = {Density functionals for surface science: Exchange-correlation model development with Bayesian error estimation},
  author = {Wellendorff, Jess and Lundgaard, Keld T. and M\o{}gelh\o{}j, Andreas and Petzold, Vivien and Landis, David D. and N\o{}rskov, Jens K. and Bligaard, Thomas and Jacobsen, Karsten W.},
  journal = {Phys. Rev. B},
  volume = {85},
  issue = {23},
  pages = {235149},
  numpages = {23},
  year = {2012},
  month = {Jun},
  publisher = {American Physical Society},
  doi = {10.1103/PhysRevB.85.235149},
  url = {https://link.aps.org/doi/10.1103/PhysRevB.85.235149}
}

@article{OC20si,
author = {Chanussot, Lowik and Das, Abhishek and Goyal, Siddharth and Lavril, Thibaut and Shuaibi, Muhammed and Riviere, Morgane and Tran, Kevin and Heras-Domingo, Javier and Ho, Caleb and Hu, Weihua and Palizhati, Aini and Sriram, Anuroop and Wood, Brandon and Yoon, Junwoong and Parikh, Devi and Zitnick, C. Lawrence and Ulissi, Zachary},
title = {Open Catalyst 2020 (OC20) Dataset and Community Challenges},
journal = {ACS Catalysis},
volume = {11},
number = {10},
pages = {6059-6072},
year = {2021},
doi = {10.1021/acscatal.0c04525},

URL = { 
        https://doi.org/10.1021/acscatal.0c04525
    
},
eprint = { 
        https://doi.org/10.1021/acscatal.0c04525
    
}

}

@article{MP,
author = {Jain, Anubhav and Ong, Shyue Ping and Hautier, Geoffroy and Chen, Wei and Richards, William Davidson and Dacek, Stephen and Cholia, Shreyas and Gunter, Dan and Skinner, David and Ceder, Gerbrand and Persson, Kristin a.},
doi = {10.1063/1.4812323},
issn = {2166532X},
journal = {APL Materials},
number = {1},
pages = {011002},
title = {{The Materials Project: A materials genome approach to accelerating materials innovation}},
url = {http://link.aip.org/link/AMPADS/v1/i1/p011002/s1\&Agg=doi},
volume = {1},
year = {2013}
}
